# Supplementary material for: A Multi-Site Study of implementing a School-Based Health Promotion Intervention in Sweden – Changes in Readiness and Implementation Outcomes
Source: Research Square preprint supplement (doi:10.21203/rs.3.rs-8410429/v1), 2026-01-19
Supplement: Supplementary file 2 [file 738f80c49f46cad89100f066.docx]

Additional file 1: Acceptability (ACC), Appropriateness (APP) and Feasibility (FEAS) Tool

The following questions regard your opinion about the Healthy School Start Program (Program=En Frisk Skolstart) as you think RIGHT NOW.

**Acceptability**

|  | Completely disagree | Disagree | Neutral | Agree | Completely agree |
| --- | --- | --- | --- | --- | --- |
| 1. HSS Program meets my approval. | 1 | 2 | 3 | 4 | 5 |
| 2. HSS Program is appealing to me. | 1 | 2 | 3 | 4 | 5 |
| 3. I like HSS Program. | 1 | 2 | 3 | 4 | 5 |
| 4. I welcome HSS Program. | 1 | 2 | 3 | 4 | 5 |

**Appropriateness**

|  | Completely disagree | Disagree | Neutral | Agree | Completely agree |
| --- | --- | --- | --- | --- | --- |
| 1. HSS Program seems fitting. | 1 | 2 | 3 | 4 | 5 |
| 2. HSS Program seems suitable. | 1 | 2 | 3 | 4 | 5 |
| 3. HSS Program seems applicable. | 1 | 2 | 3 | 4 | 5 |
| 4. HSS Program seems like a good match. | 1 | 2 | 3 | 4 | 5 |

**Feasibility**

|  | Completely disagree | Disagree | Neutral | Agree | Completely agree |
| --- | --- | --- | --- | --- | --- |
| 1. HSS Program seems implementable. | 1 | 2 | 3 | 4 | 5 |
| 2. HSS Program seems possible. | 1 | 2 | 3 | 4 | 5 |
| 3. HSS Program seems doable. | 1 | 2 | 3 | 4 | 5 |
| 4. HSS Program seems easy to use. | 1 | 2 | 3 | 4 | 5 |
