# Supplementary material for: A Multi-Site Study of implementing a School-Based Health Promotion Intervention in Sweden – Changes in Readiness and Implementation Outcomes
Source: Research Square preprint supplement (doi:10.21203/rs.3.rs-8410429/v1), 2026-01-19
Supplement: Supplementary file 3 [file da966805dd1f1d4e99368832.docx]

**Additional file 3:** Correlation (0.66) between pre-intervention Acceptability (ACC) scores and Readiness scores for all school personnel. The dotted lines indicate the median value of each variable. LRIT; Leader Readiness to Implement Tool, SRIT: Staff Readiness to Implement
